# Supplementary material
Source: PubMed Central journal article supplement (PMC11289780)
Supplement: NIHMS2007474-supplement-Supplemental.pdf [file NIHMS2007474-supplement-Supplemental.pdf]

Supplementary Figure 1:  
Melanoma objective response rates  
to first-line ICI

**All First-line  
ICI Treatments**

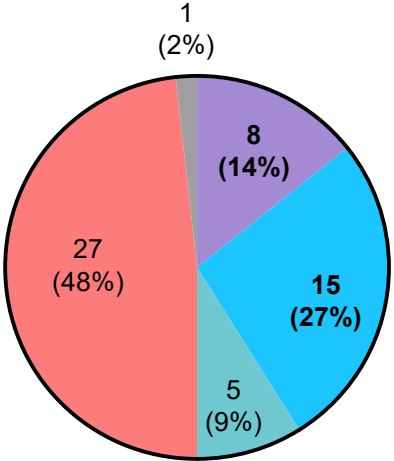

**Total=56  
ORR (CR+PR): 41%**

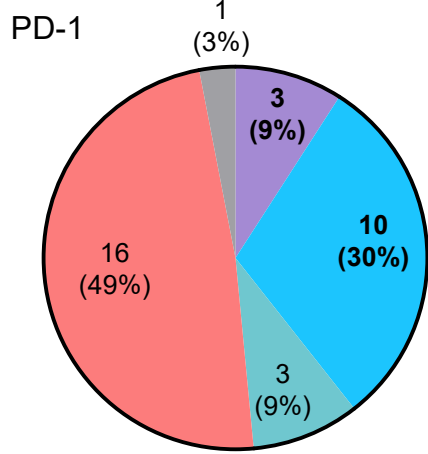

**Total=33 ORR: 39%**

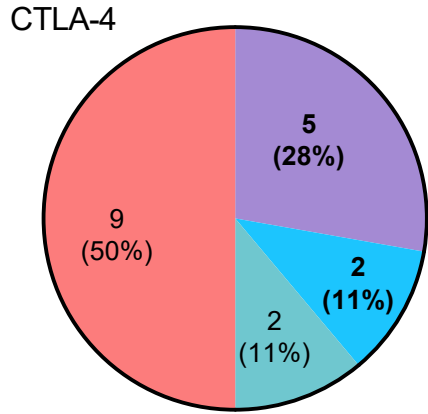

**Total=18 ORR:39%**

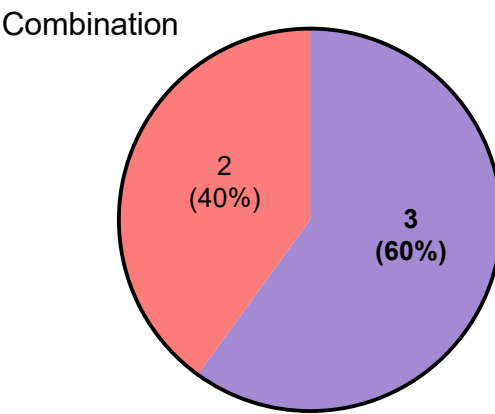

**Total=5 ORR: 60%**

**Prior/Concurrent  
CLL Treatment**

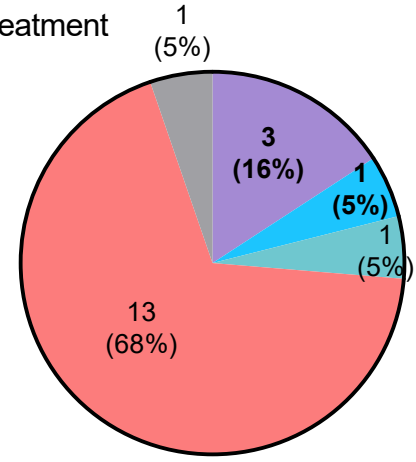

**Total=19 ORR: 21%**

**No Prior  
CLL Treatment**

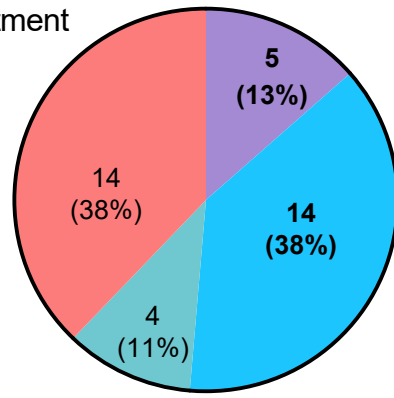

**Total=37 ORR: 51%**

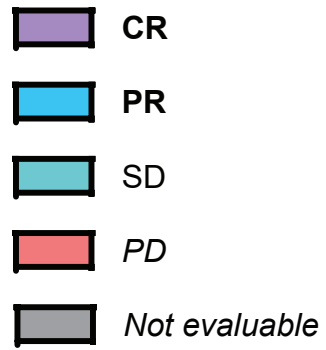

Abbreviations: CR, Complete Response; PR, Partial Response; SD, Stable Disease; PD, Progressive Disease

Supplementary Figure 2:  
Melanoma objective response rates  
to all ICI treatments (first-line and  
subsequent treatments)

**All ICI Treatments**

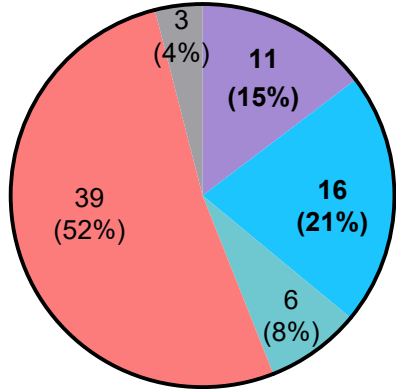

**Total=75**  
**ORR (CR+PR): 36%**

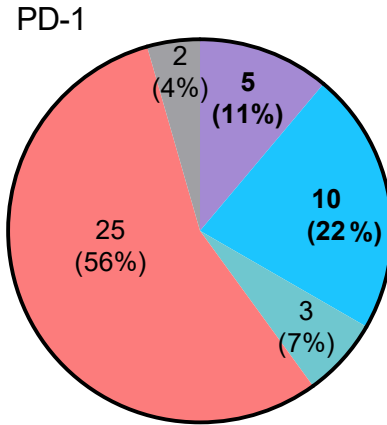

**Total=45 ORR: 33%**

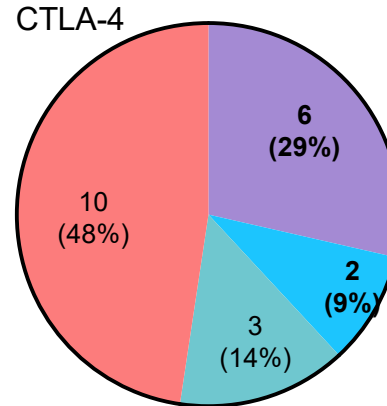

**Total=21 ORR: 38%**

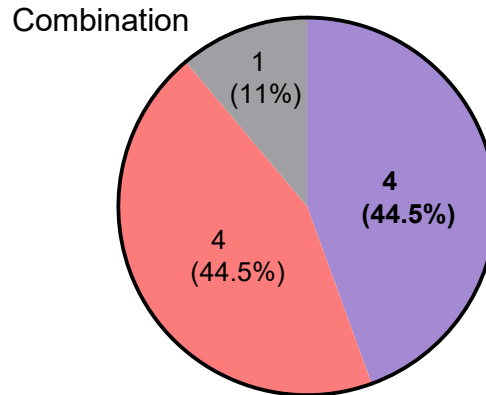

**Total=9 ORR: 44.5%**

**Prior/Concurrent  
CLL Treatment**

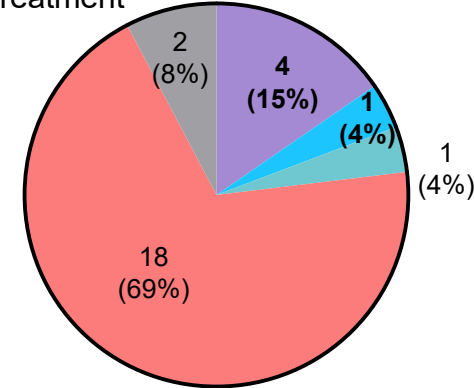

**Total=26 ORR: 19%**

**No Prior  
CLL Treatment**

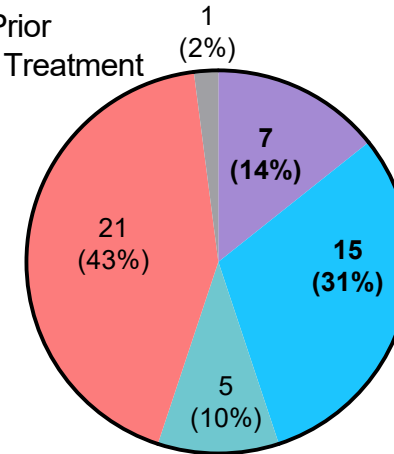

**Total=49 ORR: 45%**

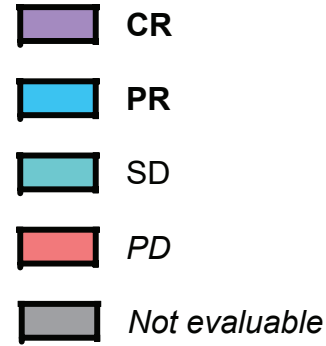

Abbreviations: CR, Complete Response; PR, Partial Response; SD, Stable Disease; PD, Progressive Disease

Supplemental Table 1: Clinicopathological characteristics of Australian cohorts with advanced melanoma, in the absence or presence of concomitant CLL

|                                                    | AUS CLL & AM<br>(N=19) |            | AUS AM Alone Cohort<br>(N=148) |            | P     |
|----------------------------------------------------|------------------------|------------|--------------------------------|------------|-------|
|                                                    | N                      | %          | N                              | %          |       |
| <b>Demographics</b>                                |                        |            |                                |            |       |
| Age > 65 years at ICI                              | 9                      | 47%        | 116                            | 78%        | 0.009 |
| Gender, Male                                       | 12                     | 63%        | 108                            | 73%        | 0.42  |
| <b>Melanoma Characteristics</b>                    |                        |            |                                |            |       |
| Stage at ICI Initiation*                           |                        |            |                                |            | <.001 |
| III                                                | 1                      | 5%         | 1                              | 1%         |       |
| IV M1a                                             | 0                      | 0%         | 28                             | 19%        |       |
| IV M1b                                             | 1                      | 5%         | 23                             | 16%        |       |
| IV M1c                                             | 7                      | 37%        | 95                             | 64%        |       |
| IV M1d                                             | 1                      | 5.3%       | 1                              | 1%         |       |
| IV unspecified                                     | 9                      | 47%        | 0                              | 0.0%       |       |
| Visceral Involvement                               | 8                      | 42%        | 118                            | 80%        | 0.001 |
| CNS Involvement                                    | 1                      | 5%         | 1                              | 1%         | 0.22  |
| <b>Melanoma Treatment</b>                          |                        |            |                                |            |       |
| First-line ICI                                     |                        |            |                                |            | <.001 |
| Anti-PD-1                                          | 13                     | 68%        | 132                            | 89%        |       |
| Anti-CTLA-4                                        | 5                      | 26%        | 0                              | 0.0%       |       |
| Combination Anti-PD-1/CTLA-4                       | 1                      | 5%         | 16                             | 11%        |       |
| Received Melanoma Treatment Prior to ICI           | 2                      | 11%        | 43                             | 29%        | 0.10  |
| Prior Therapies Described                          |                        |            |                                |            |       |
| Targeted Therapy                                   | 2                      | 11%        | 39                             | 26%        | 0.90  |
| Chemotherapy                                       | 0                      | 0.0%       | 3                              | 2%         |       |
| Combination of Agents                              | 0                      | 0.0%       | 1                              | 1%         |       |
| <b>CLL Characteristics</b>                         |                        |            |                                |            |       |
| CLL Therapy Prior to ICI                           |                        |            | <i>Not applicable</i>          |            |       |
| None                                               | 13                     | 68%        |                                |            |       |
| Chemoimmunotherapy <sup>1</sup>                    | 3                      | 16%        |                                |            |       |
| Targeted Therapy <sup>2</sup>                      | 3                      | 16%        |                                |            |       |
| <b>Labs at ICI Initiation</b>                      |                        |            |                                |            |       |
| LDH at ICI (U/L), Median [IQR]                     | 277                    | [222-363]  | 243                            | [201-285]  | 0.15  |
|                                                    |                        |            | <i>N=143</i>                   |            |       |
|                                                    |                        |            | <i>N=146</i>                   |            |       |
| ALC at ICI (10 <sup>3</sup> cell/uL), Median [IQR] | 8.1                    | [3.3-39.4] | 1.3                            | [1.0-1.95] | <.001 |

Abbreviations: AUS, Australian; CLL, chronic lymphocytic leukemia; AM, advanced melanoma; ICI, immune checkpoint inhibitors; LDH, lactate dehydrogenase; ALC, absolute lymphocyte count; U/L, units per liter; uL, microliter; IQR, interquartile range.

\*American Joint Committee on Cancer (AJCC) 8<sup>th</sup> edition melanoma staging system

<sup>1</sup> Chemoimmunotherapies included T-lymphocyte depleting agents bendamustine, fludarabine, and alemtuzumab

<sup>2</sup> Targeted therapies included non-T-lymphocyte depleting CLL therapies

Supplemental Table 2: Patient demographics and melanoma characteristics

|                                                              | All Patients<br>(N=58) |         | No Prior<br>CLL Treatment<br>(N=37) |         | Prior/Concurrent<br>CLL Treatment<br>(N=21) |         | P    |
|--------------------------------------------------------------|------------------------|---------|-------------------------------------|---------|---------------------------------------------|---------|------|
|                                                              | N                      | %       | N                                   | %       | N                                           | %       |      |
| <b>Gender, Male</b>                                          | 41                     | 71%     | 26                                  | 73%     | 15                                          | 71%     | 0.93 |
| <b>First diagnosis</b>                                       |                        |         |                                     |         |                                             |         | 0.17 |
| Melanoma                                                     | 24                     | 41%     | 18                                  | 49%     | 6                                           | 29%     |      |
| CLL                                                          | 34                     | 59%     | 19                                  | 51%     | 15                                          | 71%     |      |
| <b>Age of Melanoma<br/>Diagnosis, years<br/>Median [IQR]</b> | 67                     | [59-74] | 65                                  | [59-74] | 68                                          | [63-74] | 0.62 |
| <b>Time between Diagnoses<br/>(months), Median [IQR]</b>     | 39                     | [3-96]  | 42                                  | [2-112] | 36                                          | [5-78]  | 0.70 |
| <b>Stage at Diagnosis<sup>1</sup></b>                        |                        |         |                                     |         |                                             |         | 0.83 |
| I-II                                                         | 13                     | 22%     | 8                                   | 22%     | 5                                           | 24%     |      |
| III                                                          | 20                     | 35%     | 12                                  | 32%     | 8                                           | 38%     |      |
| IV                                                           | 25                     | 43%     | 17                                  | 46%     | 8                                           | 38%     |      |
| <b>Mutations Analysis<br/>(Melanoma)</b>                     |                        |         |                                     |         |                                             |         |      |
| BRAF (N=39)*                                                 | 19                     | 49%     | 11                                  | 44%     | 8                                           | 43%     | 0.43 |
| BRAF V600E (N=37)*                                           | 12                     | 32%     | 8                                   | 35%     | 4                                           | 29%     | 0.70 |
| TP53 (N=19) *                                                | 6                      | 32%     | 5                                   | 40%     | 1                                           | 25%     | 0.75 |
| NRAS (N=29) *                                                | 10                     | 38%     | 9                                   | 43%     | 1                                           | 13%     | 0.12 |
| KIT (N=27) *                                                 | 2                      | 7%      | 2                                   | 11%     | 0                                           | 0%      | 0.30 |
| NF1 (N=19) *                                                 | 4                      | 21%     | 3                                   | 20%     | 1                                           | 25%     | 0.83 |
| KDR (N=19) *                                                 | 3                      | 16%     | 3                                   | 20%     | 0                                           | 0%      | 0.33 |

Abbreviations: CLL, chronic lymphocytic leukemia; IQR, interquartile range.

<sup>1</sup>American Joint Committee on Cancer (AJCC) 8<sup>th</sup> edition melanoma staging system

\* n refers to the number of patients with available data for each mutational assay

Supplemental Table 3: ICI treatment characteristics

|                                                 | All Patients<br>(N=58) |           | No Prior CLL Treatment<br>(N=37) |           | Prior/Concurrent<br>CLL Treatment<br>(N=21) |           | P     |
|-------------------------------------------------|------------------------|-----------|----------------------------------|-----------|---------------------------------------------|-----------|-------|
|                                                 | N                      | %         | N                                | %         | N                                           | %         |       |
| Age >65 years at ICI                            | 32                     | 55%       | 22                               | 60%       | 10                                          | 47.6%     | 0.42  |
| Stage at ICI (Melanoma) <sup>1</sup>            |                        |           |                                  |           |                                             |           | 0.85  |
| III                                             | 5                      | 9%        | 3                                | 8%        | 2                                           | 9%        |       |
| IV                                              | 53                     | 91%       | 34                               | 92%       | 19                                          | 91%       |       |
| Melanoma Visceral Involvement at ICI initiation | 32                     | 55%       | 24                               | 65%       | 8                                           | 38%       | 0.060 |
| Melanoma CNS Involvement at ICI initiation      | 4                      | 7%        | 1                                | 3%        | 3                                           | 14%       | 0.13  |
| Melanoma Treatments Prior to ICI                | 12                     | 15%       | 11                               | 22%       | 1                                           | 3%        | 0.040 |
| Targeted Therapy Alone                          | 3                      | 4%        | 3                                | 6%        | 0                                           | 0.0%      |       |
| Immune (Not ICI) Alone                          | 6                      | 8%        | 6                                | 12%       | 0                                           | 0.0%      |       |
| Chemotherapy Alone                              | 2                      | 3%        | 2                                | 4%        | 0                                           | 0.0%      |       |
| Combination of Agents                           | 1                      | 1%        | 0                                | 0%        | 1                                           | 3%        |       |
|                                                 | N=50*                  |           | N=30*                            |           | N=20*                                       |           |       |
| LDH (U/L) at ICI Initiation,<br>Median [IQR]    | 293                    | [212-462] | 294                              | [214-427] | 272                                         | [192-470] | 0.69  |
| First-line ICI                                  |                        |           |                                  |           |                                             |           | 0.37  |
| Anti-PD-1                                       | 34                     | 57.6%     | 19                               | 5%        | 15                                          | 71%       |       |
| Anti-CTLA-4                                     | 18                     | 30.5%     | 13                               | 34%       | 5                                           | 24%       |       |
| Combination<br>Anti-PD-1/CTLA-4                 | 6                      | 10.2%     | 5                                | 13%       | 1                                           | 5%        |       |
| Subsequent ICI therapies                        |                        |           |                                  |           |                                             |           | 0.84  |
| Anti-PD-1                                       | 12                     | 57.1%     | 6                                | 50%       | 6                                           | 67%       |       |
| Anti-CTLA-4                                     | 4                      | 19.0%     | 3                                | 25%       | 1                                           | 11%       |       |
| Combination<br>Anti-PD-1/CTLA-4                 | 5                      | 23.8%     | 3                                | 25%       | 2                                           | 22%       |       |

Abbreviations: CLL, chronic lymphocytic leukemia; ICI, immune checkpoint inhibitors; U/L, units per litre.

<sup>1</sup>American Joint Committee on Cancer (AJCC) 8<sup>th</sup> edition melanoma staging system

\* n refers to the number of patients with available data for each category

Supplemental Table 4: Immune-mediated adverse events following any ICI treatment (*N*=79) in patients with concomitant CLL and advanced melanoma

|                                      | <b>Total ICI<br/>(<i>N</i>=79)</b> | <b>Anti-PD-1<br/>(<i>N</i>=46)</b> | <b>Anti-CTLA-4<br/>(<i>N</i>=22)</b> | <b>Combination<br/>(<i>N</i>=11)</b> |
|--------------------------------------|------------------------------------|------------------------------------|--------------------------------------|--------------------------------------|
| <b>Immune-mediated adverse event</b> | 31 (39.2%)                         | 16 (34.8%)                         | 8 (36.4%)                            | 7 (63.6)                             |
| <b>Fever</b>                         | 5 (6.3%)                           | 2 (4.3%)                           | 1 (4.6%)                             | 2 (18.2%)                            |
| <b>Thrombosis</b>                    | 7 (8.9%)                           | 0 (0.0%)                           | 2 (9.1%)                             | 3 (27.3%)                            |
| <b>Endocrine</b>                     | 5 (6.3%)                           | 1 (2.2%)                           | 2 (9.1%)                             | 2 (18.2%)                            |
| <b>Rash</b>                          | 11 (13.9%)                         | 3 (6.5%)                           | 7 (31.8%)                            | 1 (9.1%)                             |
| <b>Thrombocytopenia</b>              | 7 (8.9%)                           | 5 (10.9%)                          | 1 (4.6%)                             | 1 (9.1%)                             |
| <b>Atrial Fibrillation</b>           | 2 (2.5%)                           | 0 (0.0%)                           | 0 (0.0%)                             | 2 (18.2%)                            |
| <b>Colitis</b>                       | 1 (1.3%)                           | 1 (2.1%)                           | 0 (0.0%)                             | 1 (9.1%)                             |
| <b>Pneumonitis</b>                   | 3 (3.8%)                           | 2 (4.3%)                           | 0 (0.0%)                             | 1 (9.1%)                             |
| <b>Acute kidney injury</b>           | 1 (1.3%)                           | 1 (2.2%)                           | 0 (0.0%)                             | 0 (0.0%)                             |
| <b>Transaminitis</b>                 | 9 (11.4%)                          | 4 (8.7%)                           | 3 (13.6%)                            | 2 (18.2%)                            |
| <b>Arthritis</b>                     | 6 (7.6%)                           | 3 (6.5%)                           | 1 (4.6%)                             | 2 (18.2%)                            |
| <b>Uveitis</b>                       | 3 (3.8%)                           | 0 (0.0%)                           | 1 (4.6%)                             | 2 (18.2%)                            |

Abbreviation: ICI, immune checkpoint inhibitor; CLL, chronic lymphocytic leukemia  
 Data described as n, number (%), percentage). An adverse event following ICI initiation was defined as a binary outcome (ie. an event occurred following ICI treatment, yes or no).
